# Supplementary material for: Luminescent isomeric Pr–Ag coordination polymers immobilized with organic sensitizer and Ag–S clusters
Source: Royal Society of Chemistry journal article supplement (doi:10.1039/c1dt10453e), 2011-01-01
Supplement: c1dt10453e.pdf [file c1dt10453e.pdf]

*Electronic Supplementary Information*

**Luminescent Isomeric Pr-Ag Coordination Polymers Immobilized  
with Organic Sensitizer and Ag-S Clusters**

Hai-Lin Cui<sup>a</sup>, Shun-Ze Zhan<sup>a</sup>, Mian Li<sup>a</sup>, Seik Weng Ng<sup>b</sup> and Dan Li<sup>a\*</sup>

<sup>a</sup> Department of Chemistry, Shantou University, Guangdong, 515063, People's Republic of China.

E-mail: dli@stu.edu.cn; Fax: +86 754 8290-2767; Tel: +86 754 8290-2741

<sup>b</sup> Department of Chemistry, University of Malaya, Kuala Lumpur, 50603, Malaysia

\*E-mail: dli@stu.edu.cn; Fax: +86 754 8290-2767; Tel: +86 754 8290-2741

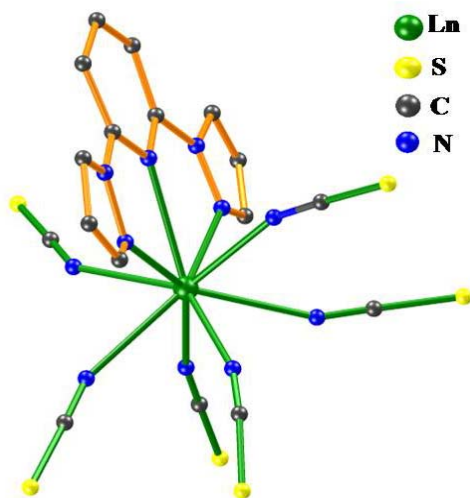

**Fig. S1** Anionic coordination unit of  $[\text{PrL}(\text{SCN})_6]^{3-}$  showing all N atoms bonded to Pr<sup>III</sup> ion exclusively in **1** and **2**.

**Table S1. Selected Bond Lengths (Å) and Angles (deg) for 1-2**

| <b>1</b>         |            | <b>2</b>             |            |
|------------------|------------|----------------------|------------|
| Pr(1)-N(9)       | 2.532(4)   | Pr(1)-N(10)          | 2.531(5)   |
| Pr(1)-N(11)      | 2.569(4)   | Pr(1)-N(11)#1        | 2.536(4)   |
| Pr(1)-N(8)       | 2.572(4)   | Pr(1)-N(1)           | 2.561(4)   |
| Pr(1)-N(6)       | 2.586(4)   | Pr(1)-N(6)#2         | 2.575(4)   |
| Pr(1)-N(5)       | 2.597(4)   | Pr(1)-N(5)           | 2.604(4)   |
| Pr(1)-N(1)       | 2.605(3)   | Pr(1)-N(9)           | 2.611(5)   |
| Pr(1)-N(7)       | 2.606(4)   | Pr(1)-N(8)           | 2.624(4)   |
| Pr(1)-N(10)      | 2.619(4)   | Pr(1)-N(7)#2         | 2.625(4)   |
| Pr(1)-N(3)       | 2.710(3)   | Pr(1)-N(3)           | 2.714(4)   |
| Ag(1)-Ag(1)#3    | 3.0138(8)  | Ag(1)-Ag(2)          | 3.4992(3)  |
| Ag(1)-Ag(3)      | 3.1730(6)  | Ag(1)-Ag(3)          | 4.3630(6)  |
| Ag(2)-Ag(3)#5    | 2.9444(6)  | Ag(2)-Ag(3)          | 3.5398(2)  |
| Ag(1)-S(4)#1     | 2.5329(12) | Ag(1)-S(2)           | 2.5721(15) |
| Ag(1)-S(1)       | 2.5549(12) | Ag(1)-S(4)#3         | 2.5786(16) |
| Ag(1)-S(2)       | 2.5795(11) | Ag(1)-S(1)           | 2.6268(15) |
| Ag(1)-S(4)#2     | 2.7926(12) | Ag(1)-S(3)           | 2.6453(16) |
| Ag(2)-S(6)#4     | 2.5401(14) | Ag(2)-S(3)#4         | 2.5086(17) |
| Ag(2)-S(1)#5     | 2.6384(12) | Ag(2)-S(1)           | 2.5269(15) |
| Ag(2)-S(3)       | 2.6755(13) | Ag(2)-S(5)           | 2.6086(15) |
| Ag(2)-S(5)       | 2.7463(13) | Ag(3)-S(6)           | 2.5350(15) |
| Ag(3)-S(2)       | 2.5770(11) | Ag(3)-S(5)           | 2.5684(14) |
| Ag(3)-S(3)#6     | 2.6131(12) | Ag(3)-S(4)           | 2.6599(17) |
| Ag(3)-S(5)#6     | 2.6615(12) | Ag(3)-S(2)           | 2.6933(16) |
| Ag(3)-S(2)#7     | 2.7275(11) |                      |            |
| N(9)-Pr(1)-N(11) | 74.54(13)  | N(10)-Pr(1)-N(11)#1  | 99.25(17)  |
| N(9)-Pr(1)-N(8)  | 96.44(14)  | N(10)-Pr(1)-N(1)     | 144.07(15) |
| N(11)-Pr(1)-N(8) | 139.91(12) | N(11)#1-Pr(1)-N(1)   | 77.74(15)  |
| N(9)-Pr(1)-N(6)  | 138.81(13) | N(10)-Pr(1)-N(6)#2   | 141.82(15) |
| N(11)-Pr(1)-N(6) | 135.60(12) | N(11)#1-Pr(1)-N(6)#2 | 75.05(15)  |
| N(8)-Pr(1)-N(6)  | 75.82(13)  | N(1)-Pr(1)-N(6)#2    | 72.72(15)  |
| N(9)-Pr(1)-N(5)  | 150.38(13) | N(10)-Pr(1)-N(5)     | 84.07(16)  |
| N(11)-Pr(1)-N(5) | 89.11(12)  | N(11)#1-Pr(1)-N(5)   | 142.09(14) |
| N(8)-Pr(1)-N(5)  | 80.16(13)  | N(1)-Pr(1)-N(5)      | 120.36(14) |
| N(6)-Pr(1)-N(5)  | 69.26(12)  | N(6)#2-Pr(1)-N(5)    | 79.35(15)  |
| N(9)-Pr(1)-N(1)  | 78.99(13)  | N(10)-Pr(1)-N(9)     | 72.56(16)  |
| N(11)-Pr(1)-N(1) | 72.40(12)  | N(11)#1-Pr(1)-N(9)   | 73.41(15)  |
| N(8)-Pr(1)-N(1)  | 145.39(12) | N(1)-Pr(1)-N(9)      | 72.32(14)  |
| N(6)-Pr(1)-N(1)  | 85.24(13)  | N(6)#2-Pr(1)-N(9)    | 136.80(15) |
| N(5)-Pr(1)-N(1)  | 119.93(11) | N(5)-Pr(1)-N(9)      | 141.37(14) |
| N(9)-Pr(1)-N(7)  | 70.80(13)  | N(10)-Pr(1)-N(8)     | 71.54(15)  |

|                     |                   |                          |                          |
|---------------------|-------------------|--------------------------|--------------------------|
| N(11)-Pr(1)-N(7)    | 133.87(13)        | N(11)#1-Pr(1)-N(8)       | 145.93(15)               |
| N(8)-Pr(1)-N(7)     | 74.23(13)         | N(1)-Pr(1)-N(8)          | 90.86(15)                |
| N(6)-Pr(1)-N(7)     | 68.16(12)         | N(6)#2-Pr(1)-N(8)        | 132.29(14)               |
| N(5)-Pr(1)-N(7)     | 134.33(13)        | N(5)-Pr(1)-N(8)          | 71.05(14)                |
| N(1)-Pr(1)-N(7)     | 71.89(12)         | N(9)-Pr(1)-N(8)          | 72.54(15)                |
| N(9)-Pr(1)-N(10)    | 79.04(13)         | N(10)-Pr(1)-N(7)#2       | 72.78(15)                |
| N(11)-Pr(1)-N(10)   | 72.14(12)         | N(11)#1-Pr(1)-N(7)#2     | 74.83(15)                |
| N(8)-Pr(1)-N(10)    | 67.79(12)         | N(1)-Pr(1)-N(7)#2        | 137.54(14)               |
| N(6)-Pr(1)-N(10)    | 130.55(13)        | N(6)#2-Pr(1)-N(7)#2      | 69.29(14)                |
| N(5)-Pr(1)-N(10)    | 72.41(12)         | N(5)-Pr(1)-N(7)#2        | 70.17(14)                |
| N(1)-Pr(1)-N(10)    | 142.07(12)        | N(9)-Pr(1)-N(7)#2        | 127.61(15)               |
| N(7)-Pr(1)-N(10)    | 127.70(13)        | N(8)-Pr(1)-N(7)#2        | 129.05(15)               |
| N(9)-Pr(1)-N(3)     | 129.91(12)        | N(10)-Pr(1)-N(3)         | 132.74(15)               |
| N(11)-Pr(1)-N(3)    | 66.62(11)         | N(11)#1-Pr(1)-N(3)       | 128.00(14)               |
| N(8)-Pr(1)-N(3)     | 133.66(12)        | N(1)-Pr(1)-N(3)          | 60.24(13)                |
| N(6)-Pr(1)-N(3)     | 68.99(11)         | N(6)#2-Pr(1)-N(3)        | 64.70(13)                |
| N(5)-Pr(1)-N(3)     | 59.92(11)         | N(5)-Pr(1)-N(3)          | 60.26(14)                |
| N(1)-Pr(1)-N(3)     | 60.25(11)         | N(9)-Pr(1)-N(3)          | 116.07(14)               |
| N(7)-Pr(1)-N(3)     | 116.72(11)        | N(8)-Pr(1)-N(3)          | 68.25(13)                |
| N(10)-Pr(1)-N(3)    | 115.46(11)        | N(7)#2-Pr(1)-N(3)        | 116.31(13)               |
| S(4)#1-Ag(1)-S(1)   | 109.30(4)         | S(2)-Ag(1)-S(4)#3        | 127.93(6)                |
| S(4)#1-Ag(1)-S(2)   | 116.49(4)         | S(2)-Ag(1)-S(1)          | 112.34(5)                |
| S(1)-Ag(1)-S(2)     | 124.49(4)         | S(4)#3-Ag(1)-S(1)        | 106.49(5)                |
| S(4)#1-Ag(1)-S(4)#2 | 111.27(3)         | S(2)-Ag(1)-S(3)          | 98.26(5)                 |
| S(1)-Ag(1)-S(4)#2   | 95.20(4)          | S(4)#3-Ag(1)-S(3)        | 106.85(6)                |
| S(2)-Ag(1)-S(4)#2   | 95.90(3)          | S(1)-Ag(1)-S(3)          | 101.26(6)                |
| S(6)#4-Ag(2)-S(1)#5 | 100.42(4)         | S(3)#4-Ag(2)-S(1)        | 136.15(5)                |
| S(6)#4-Ag(2)-S(3)   | 122.82(5)         | S(3)#4-Ag(2)-S(5)        | 109.72(6)                |
| S(1)#5-Ag(2)-S(3)   | 116.56(4)         | S(1)-Ag(2)-S(5)          | 105.12(4)                |
| S(6)#4-Ag(2)-S(5)   | 112.38(5)         | S(6)-Ag(3)-S(5)          | 101.32(5)                |
| S(1)#5-Ag(2)-S(5)   | 103.24(4)         | S(6)-Ag(3)-S(4)          | 114.68(6)                |
| S(3)-Ag(2)-S(5)     | 100.24(4)         | S(5)-Ag(3)-S(4)          | 127.18(5)                |
| S(2)-Ag(3)-S(3)#6   | 123.64(4)         | S(6)-Ag(3)-S(2)          | 127.12(5)                |
| S(2)-Ag(3)-S(5)#6   | 121.90(4)         | S(5)-Ag(3)-S(2)          | 92.76(4)                 |
| S(3)#6-Ag(3)-S(5)#6 | 104.15(4)         | S(4)-Ag(3)-S(2)          | 94.62(5)                 |
| S(2)-Ag(3)-S(2)#7   | 100.06(3)         |                          |                          |
| S(3)#6-Ag(3)-S(2)#7 | 104.30(4)         |                          |                          |
| S(5)#6-Ag(3)-S(2)#7 | 97.72(4)          |                          |                          |
| Symmetry codes:     |                   | Symmetry codes:          |                          |
| #1 x+1, y-1, z      | #2 -x+1, -y+2, -z | #1 -x-1/2, y-1/2, -z+3/2 | #2 x+1/2, -y+1/2, z-1/2  |
| #3 -x+2, -y+1, -z   | #4 x+1, y, z      | #3 x+1/2, -y+1/2, z+1/2  | #4 -x, -y+1, -z+2        |
| #5 x, y+1, z        | #6 x, y-1, z      | #5 x-1/2, -y+1/2, z+1/2  | #6 -x-1/2, y+1/2, -z+3/2 |
| #7 -x+1, -y+1, -z   |                   | #7 x-1/2, -y+1/2, z-1/2  |                          |

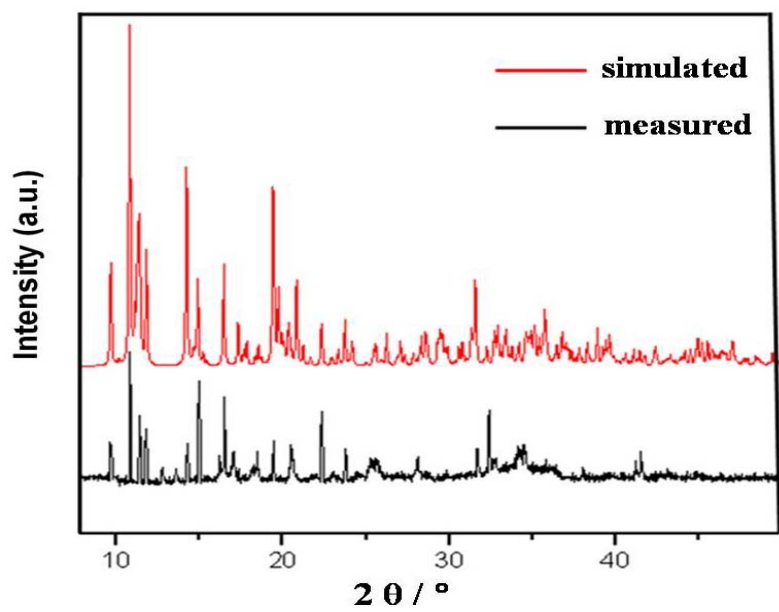

(a)

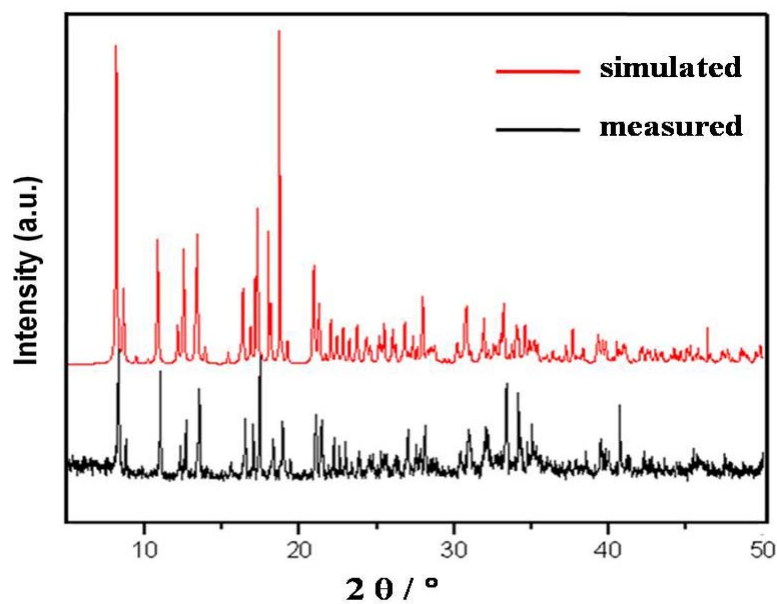

(b)

**Fig. S2** X-ray Powder diffraction patterns of **1** (a) and **2** (b).

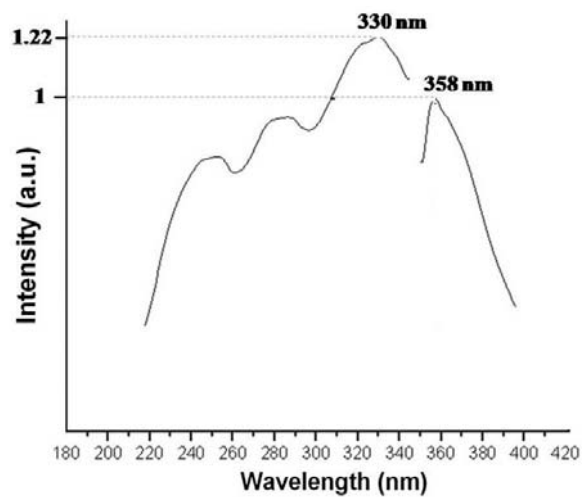

Fig. S3 Excitation and emission spectra of L in the solid state.

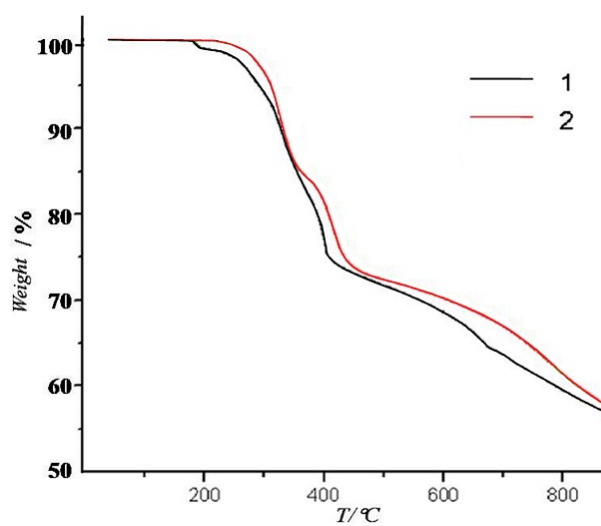

Fig. S4 TGA plots of 1-2
